# Supplementary material
Source: PubMed Central journal article supplement (PMC4391564)
Supplement: supp_115.174490_174490SI.pdf [file supp_115.174490_174490SI.pdf]

Table S1: qPCR primers used in this study

| <i>Gene</i>  | primer name | sequence                  |
|--------------|-------------|---------------------------|
| <i>RAD6</i>  | C1205       | TGCCCCACCGGGTGTA          |
|              | C1166       | GCGTTCCATACCATGACGTTATC   |
| <i>RAD18</i> | C1167       | G TTCAGG TTCAGTGGGACATTCT |
|              | C1168       | GGTTCCCTGGTCACTTTGAACT    |
| <i>UBC13</i> | C1171       | TGACGTCGCTGAAGATTGGA      |
|              | C1172       | CATTCGCGAGCCTTAGCTTT      |
| <i>REV3</i>  | C1177       | CCATCGCACGGTGAAAGC        |
|              | C1178       | AAGCACCAAACACCCTGATGT     |
| <i>RNR2</i>  | C1197       | CCATTCACACCATCCCAGAAA     |
|              | C1198       | CTTGAATCCATCTTAAAGCCCATT  |
| <i>ALG9</i>  | C1215       | CTGTGGAATTATTGCCTTC       |
|              | C1216       | GCCTAGTATACTAGCCAGG       |

Table S2: Strains used in supplemental material

| <i>Strain</i> | <i>Genotype</i>                                   | <i>Source</i>       |
|---------------|---------------------------------------------------|---------------------|
| JC2257        | W303 <i>MATa rev1Δ::HIS3</i>                      | Xiao lab (WXY29-36) |
| JC2283        | W303 <i>MATa yng2Δ::URA3, mms2Δ::HIS3</i>         | this study          |
| JC2290        | W303 <i>MATa mms2Δ::HIS3</i>                      | this study          |
| JC2619        | W303 <i>MATa yng2Δ::URA3, rev1Δ::HIS3</i>         | this study          |
| JC2769        | W303 <i>MATa esa1-L254P::NatRMX4, rev1Δ::HIS3</i> | this study          |
| JC2773        | W303 <i>MATa esa1-L254P::NatRMX4, mms2Δ::HIS3</i> | this study          |
| JC3119        | W303 <i>MATa eaf1Δ::URA3, ubc13Δ::HIS3</i>        | this study          |
| JC3220        | W303 <i>MATa eaf1Δ::URA3, rev3Δ::LEU2</i>         | this study          |
| JC3430        | W303 <i>MATa eaf1Δ::URA3</i>                      | this study          |

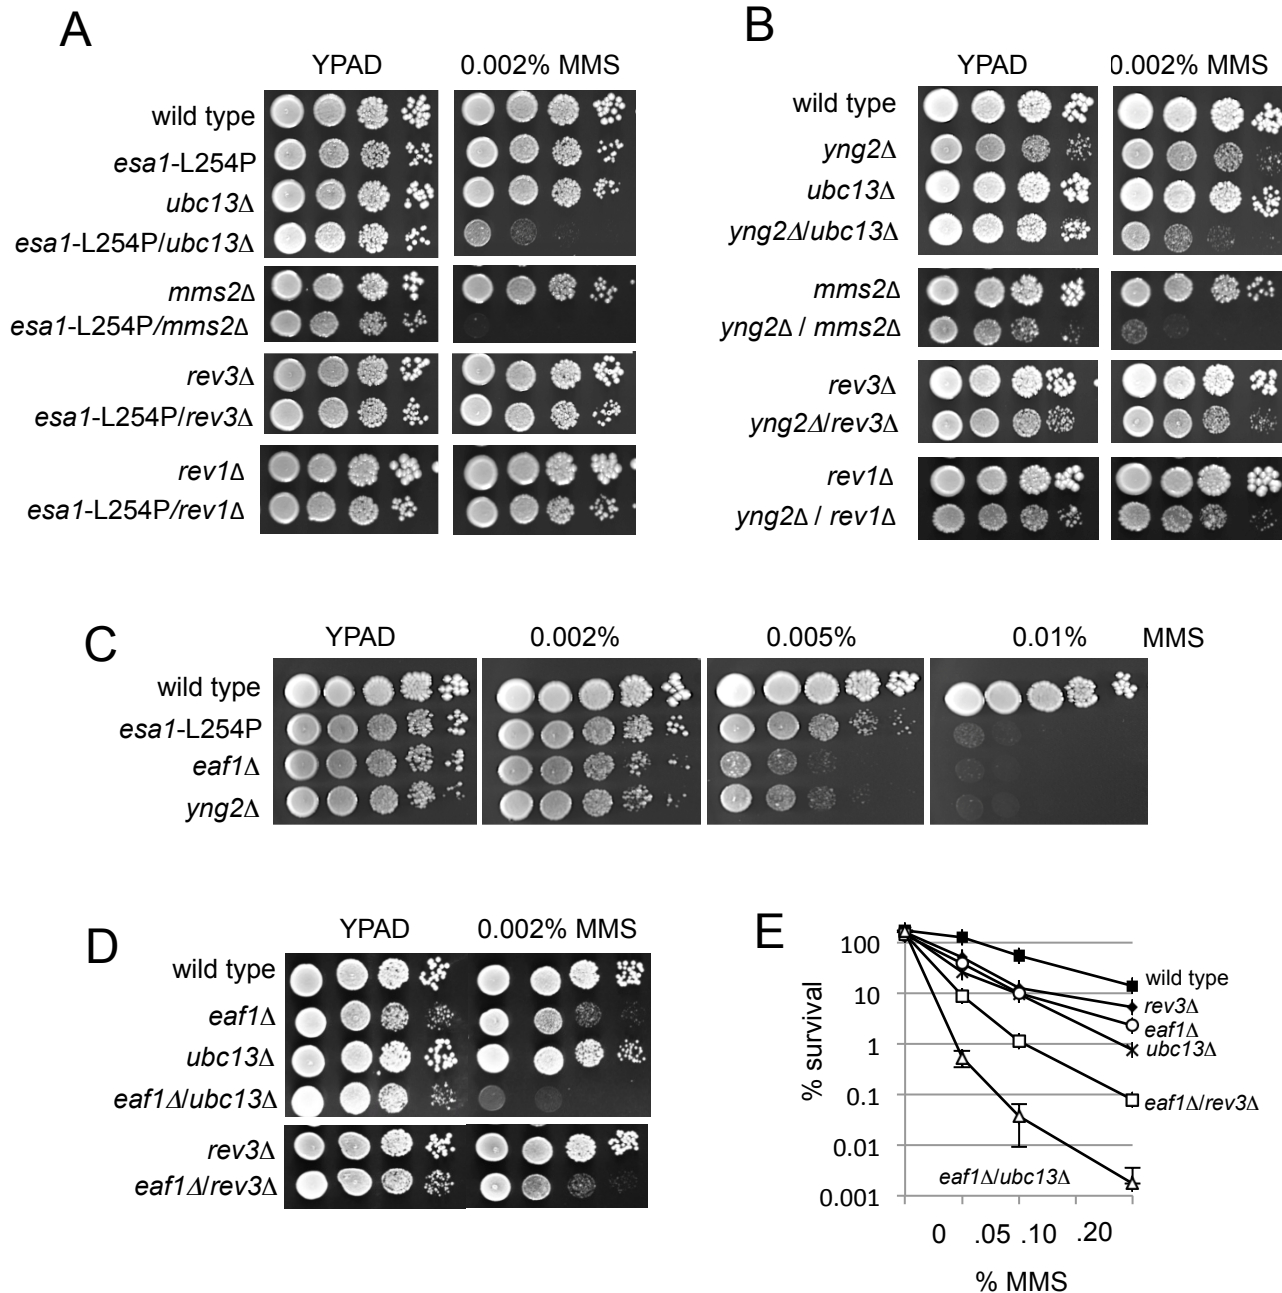

**Figure S1 Similar to other NuA4 components, the loss of EAF1 interacts genetically with the DNA damage tolerance (DDT) pathway.** (A) Drop assays (1:10 serial dilutions) from exponentially growing cultures were performed on YPAD +/- media containing the indicated concentrations of MMS at 30°C for wild type (JC470), *esa1-L254P* (JC2767), *ubc13Δ* (JC2291), *esa1-L254P/ubc13Δ* (JC2775), *mms2Δ* (JC2290), *esa1-L254P/mms2Δ* (JC2773), *rev3Δ* (JC2289), and *esa1-L254P/rev3Δ* (JC2771), *rev1Δ* (JC2257), and *esa1-L254P/rev1Δ* (JC2769). (B) *yng2Δ* (JC2036), *yng2Δ/ubc13Δ* (JC2285), *yng2Δ/mms2Δ* (JC2283), *yng2Δ/rev3Δ* (JC2281) and *yng2Δ/rev1Δ* (JC2619). (C) *eaf1Δ* (JC3430), *yng2Δ* (JC2036), and (D) *ubc13Δ* (JC2291), *eaf1Δ/ubc13Δ* (JC3219), *rev3Δ* (JC2289), and *eaf1Δ/rev3Δ* (JC3220). (E) Cell survival was measured after transient exposure to increasing concentrations of MMS for 1 hr. with the same strains in D.

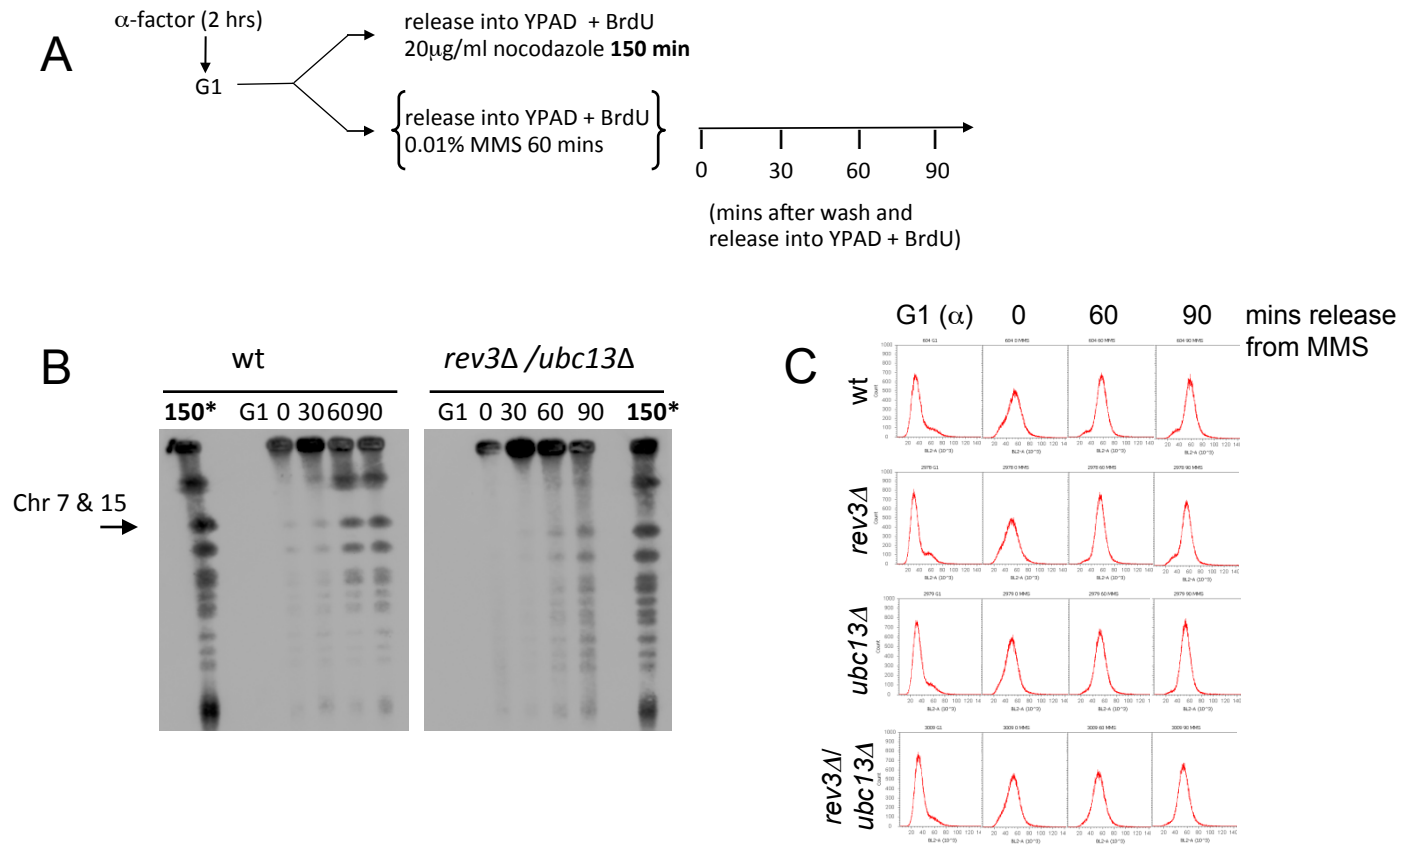

**Figure S2 Pulse Field Gel Electrophoresis (PFGE) was performed on cells disrupted for DDT factors.** (A) Cells were arrested in  $\alpha$ -factor for 2 hours followed by release into YPAD media containing bromodeoxyuridine (BrdU; 400 $\mu$ g/ml) and either nocodazole (7.5 $\mu$ g/ml) for 2.5 hours or 0.01% MMS for 1 hour. Following MMS treatment, cells were released into YPAD and samples were collected at the indicated time points. (B) Pulse Field Gel Electrophoresis (PFGE) was performed, followed by a Southern transfer to nitrocellulose, and blotted with  $\alpha$ -BrdU antibodies in wild type (JC604) and *rev3 $\Delta$ /ubc13 $\Delta$*  (JC3009), (C) The cell cycle stage was monitored by flow cytometry. All data shown here follows the same protocols as in Figs. 2 and 3.



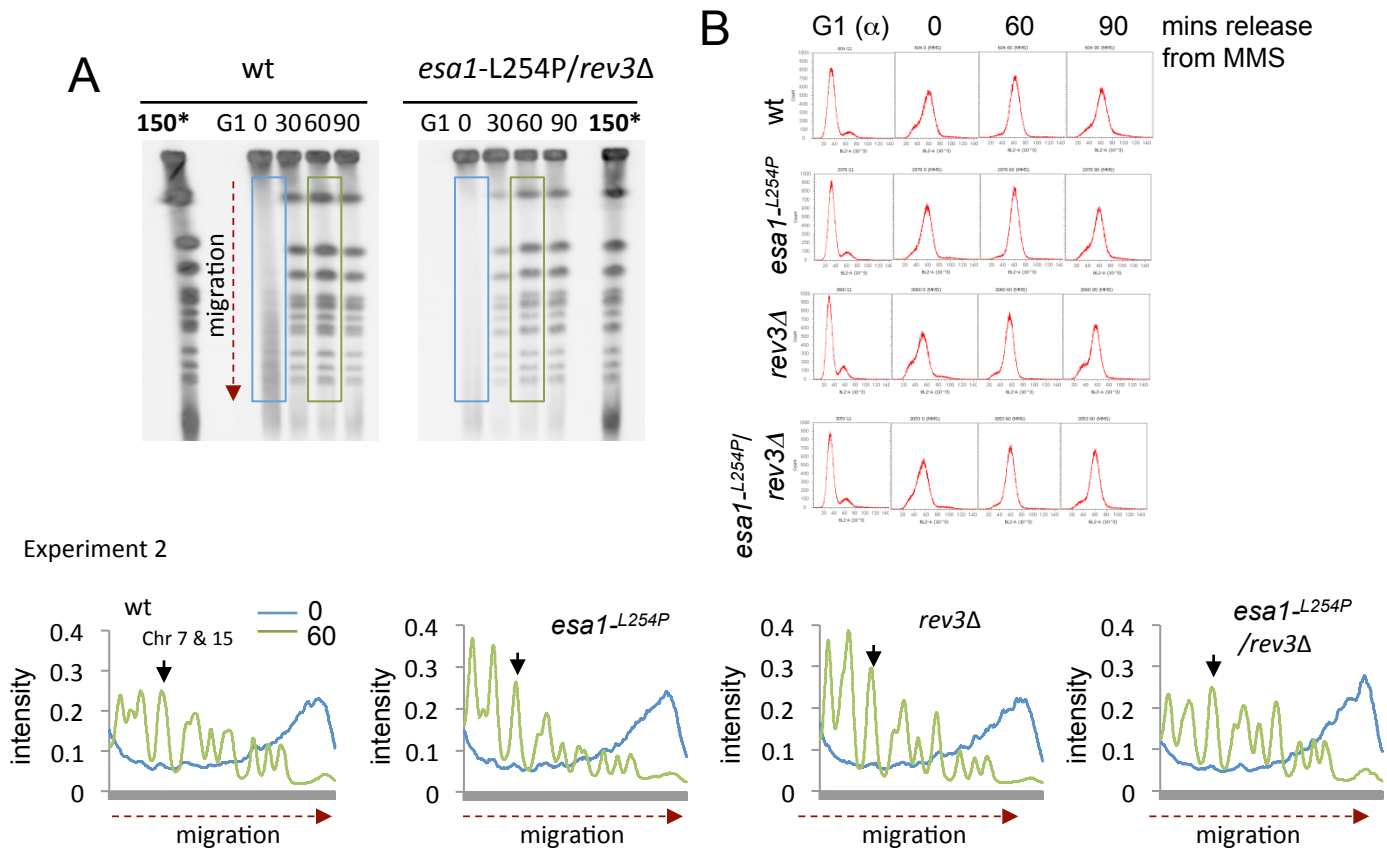

**Figure S3 Pulse Field Gel Electrophoresis (PFGE) was performed on cells disrupted for the error prone bypass factor *rev3Δ* in combination with *esa1-L254P*.** Cells were arrested in  $\alpha$ -factor for 2 hours followed by release into YPAD media containing bromodeoxyuridine (BrdU; 400 $\mu$ g/ml) and either nocodazole (7.5 $\mu$ g/ml) for 2.5 hours or 0.01% MMS for 1 hour. Following MMS treatment, cells were released into YPAD + BrdU and samples were collected at the indicated time points. Pulse Field Gel Electrophoresis (PFGE) was performed, followed by a Southern transfer to nitrocellulose, and blotted with  $\alpha$ -BrdU antibodies in wild type (JC604), *esa1-L254P* (JC3060), *rev3Δ* (JC2978) and *esa1-L254P/rev3Δ* (JC3053) - (A) pictures of one representative gel for wild type and the double mutant demonstrates that in the absence of MMS, replication and chromosome integrity is indistinguishable between wild type and the double mutant (150\* on gel). (B) The cell cycle stage was monitored by flow cytometry. (C) The BrdU signal at the 0 min (blue) and 60 min (green) time points were quantified by Image J with the migration distance of chromosomes vs the intensity of BrdU plotted, giving a measure of newly synthesized chromosomes during one round of DNA replication. All data shown here follows the same protocols as in Figs. 2 and 3.

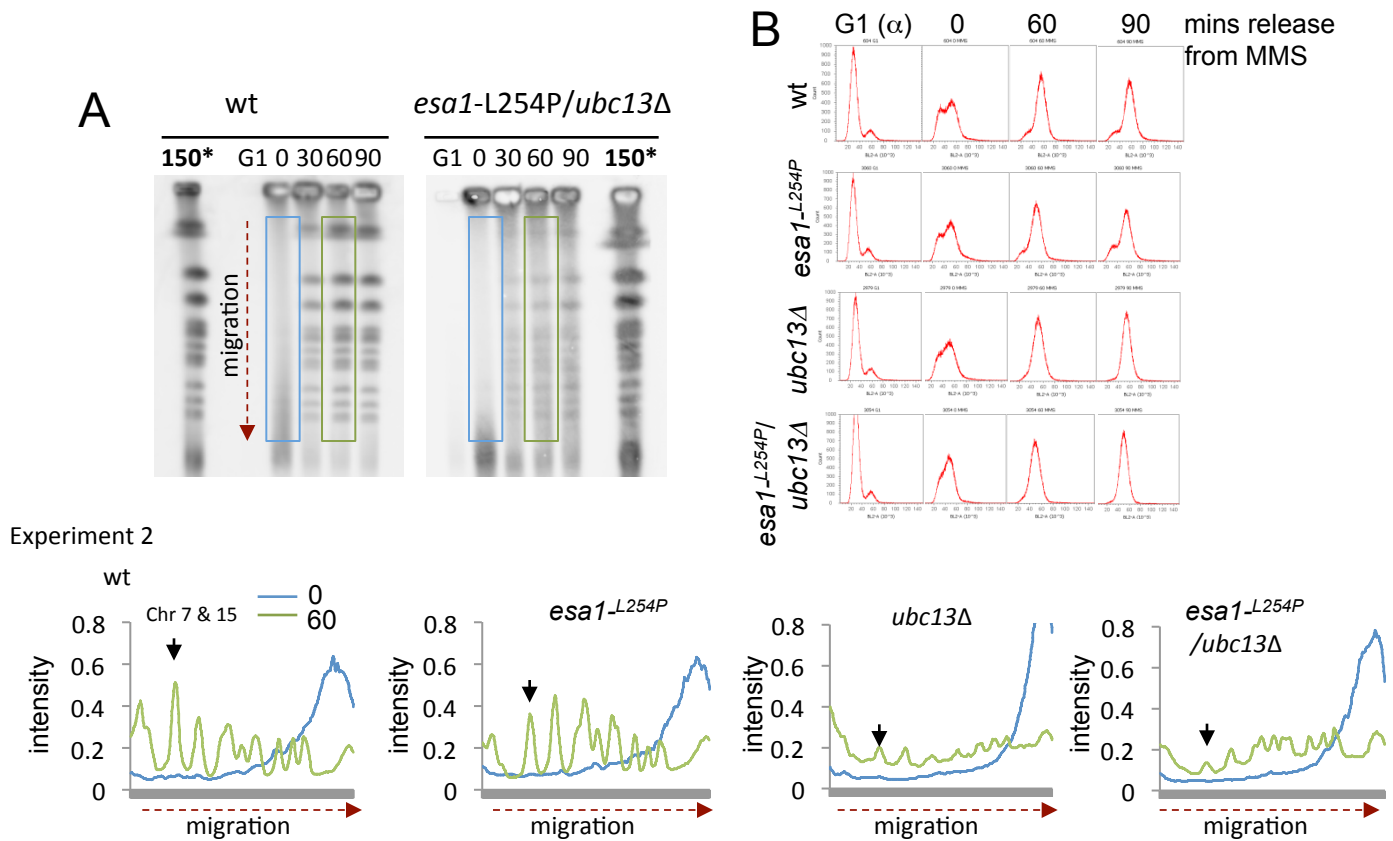

**Figure S4 Pulse Field Gel Electrophoresis (PFGE) was performed on cells disrupted for the error free bypass factor *ubc13Δ* in combination with *esa1-L254P*.** Cells were arrested in  $\alpha$ -factor for 2 hours followed by release into YPAD media containing bromodeoxyuridine (BrdU; 400 $\mu$ g/ml) and either nocodazole (7.5 $\mu$ g/ml) for 2.5 hours or 0.01% MMS for 1 hour. Following MMS treatment, cells were released into YPAD + BrdU and samples were collected at the indicated time points. Pulse Field Gel Electrophoresis (PFGE) was performed, followed by a Southern transfer to nitrocellulose, and blotted with  $\alpha$ -BrdU antibodies in wild type (JC604), *esa1-L254P* (JC3060), *ubc13Δ* (JC2979) and *esa1-L254P/ubc13Δ* (JC3054) - (A) pictures of one representative gel for wild type and the double mutant demonstrates that in the absence of MMS, replication and chromosome integrity is indistinguishable between wild type and the double mutant (150\* on gel). (B) The cell cycle stage was monitored by flow cytometry. (C) The BrdU signal at the 0 min (blue) and 60 min (green) time points were quantified by Image J with the migration distance of chromosomes vs the intensity of BrdU plotted, giving a measure of newly synthesized chromosomes during one round of DNA replication. All data shown here follows the same protocols as in Figs. 2 and 3.

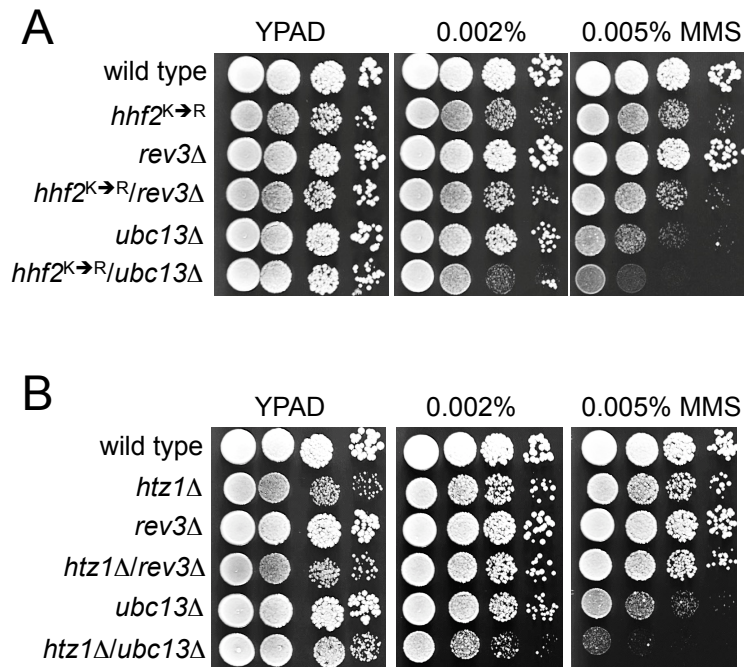

**Figure S5 NuA4 target histone H4 shows genetic interactions with the DDT pathway (A)** Drop assays (1:10 serial dilutions) from exponentially growing cultures were performed on YPAD +/- media containing the indicated concentrations of MMS at 30°C for wild type (JC470), *hhf2<sup>K→R</sup>* (JC3178), *rev3Δ* (JC2289), *hhf2<sup>K→R</sup>/rev3Δ* (JC3195) *ubc13Δ* (JC2291), *hhf2<sup>K→R</sup>/ubc13Δ* (JC3179), and (B) *htz1Δ* (JC2090), *htz1Δ/rev3Δ* (JC2762) and *htz1Δ/ubc13Δ* (JC2764)

**A**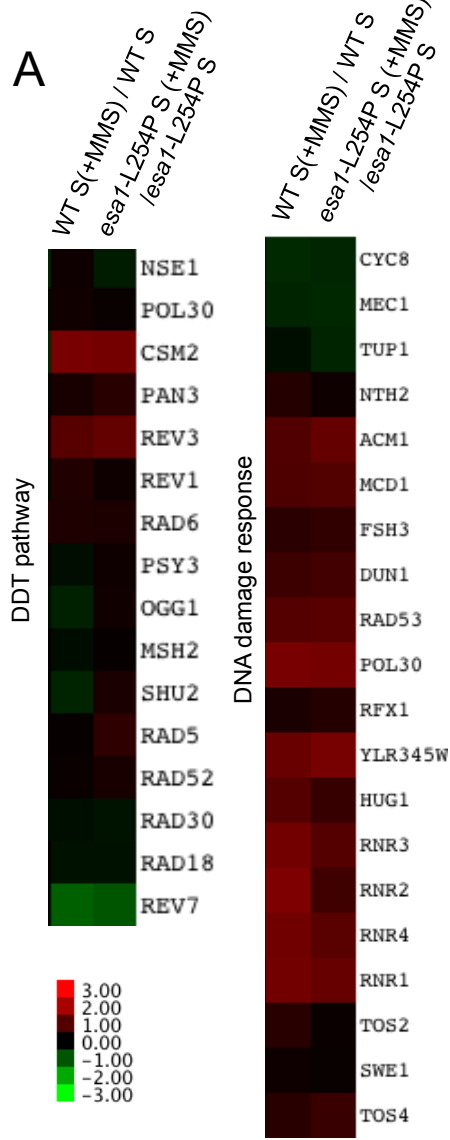**B**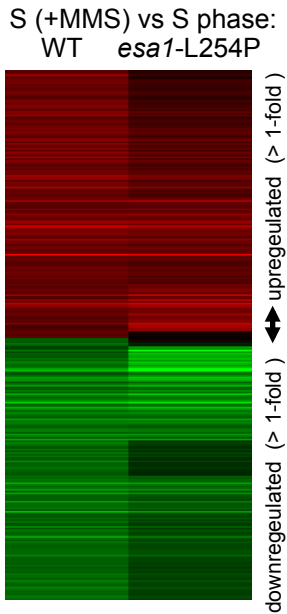**C**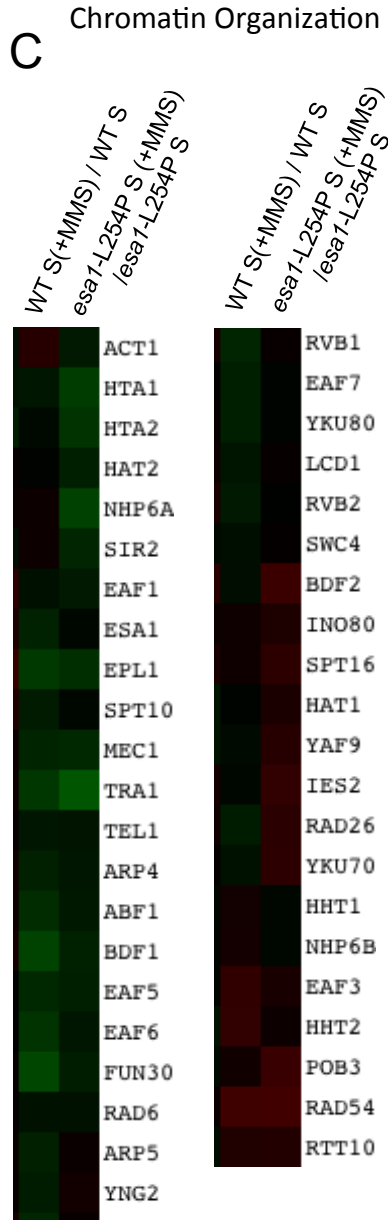**D**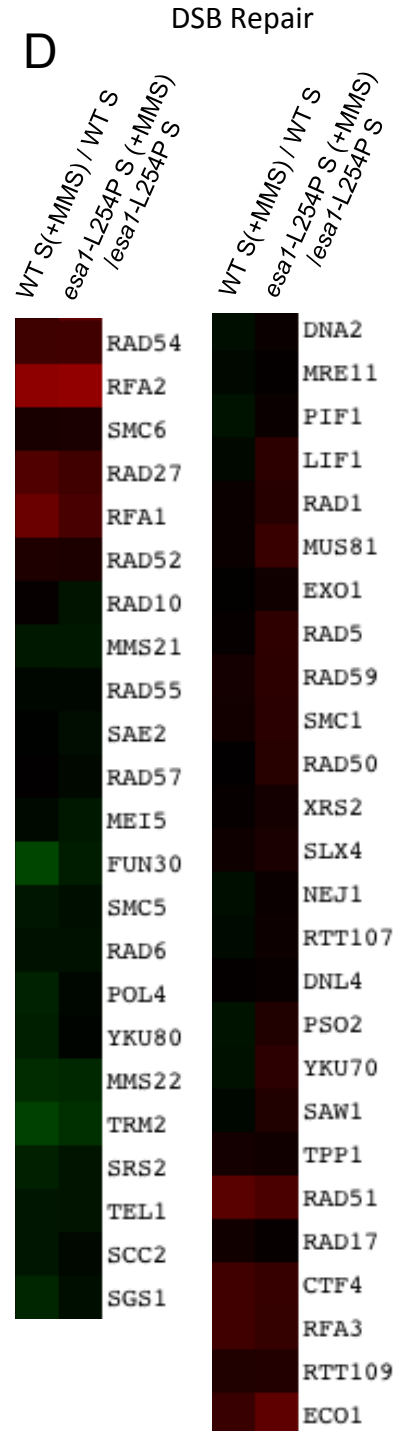

**Figure S6 Transcriptional comparison of Gene Upregulation in MMS vs. Untreated S phase samples .** Cells arrested in  $\alpha$ -factor were released into normal YPAD or YPAD/0.05% MMS for 1hr. RNA was extracted followed by microarray. (A) Transcriptome analysis was performed as described in the Materials and Methods. Heat maps of the genome-wide expression profile of 0.05% MMS vs. untreated samples of wild type and *esa1*-L254P in S phase. Sample genes from the DNA damage tolerance pathway and genes upregulated as part of the transcriptional DNA damage response from derepression of Crt1/Rfx1 and Nrm1. (B) Heat map of the genome-wide expression profile of 0.05% MMS vs. untreated samples indicated that the NuA4 allele, *esa1*-L254P, had a similar transcriptional profile compared to wild type cells. Data looking at specific subsets of genes associated with (C) Chromatin Organization and (D) Double-Strand Break Repair shows few differences between strains.

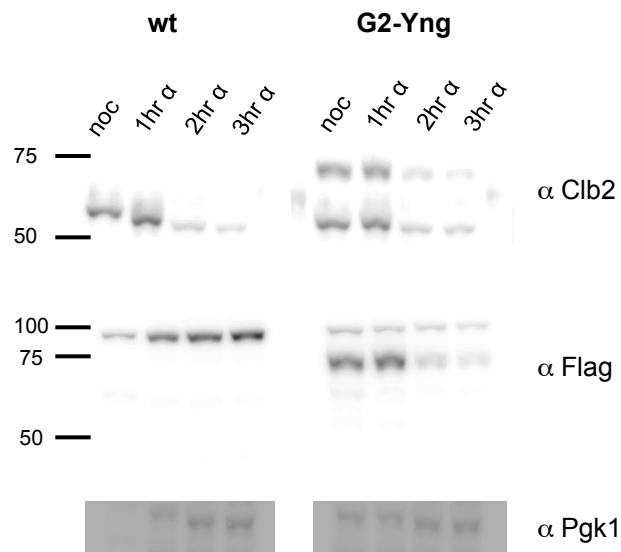

**Figure S7 G2-Yng2 expression after Nocodazole release.** Degradation of G2-Yng2 after S-phase follows the same pattern as Clb2. During a normal cell cycle Clb2 is rapidly degraded at mitosis. Wild type (JC470) and G2-Yng2 (JC3387) were arrested in nocodazole for 3 hours following release into YPAD media with  $\alpha$ -factor with samples taken at indicated times. Immunoblots were performed with antibodies  $\alpha$ -Clb2 and  $\alpha$ -Flag (to visualize G2-Yng2-Flag, and  $\alpha$ -Pgk1 used as a loading control. Degradation of G2-Yng2 follows the same kinetics as degradation of Clb2 in both G2-Yng2 and wild type cells.

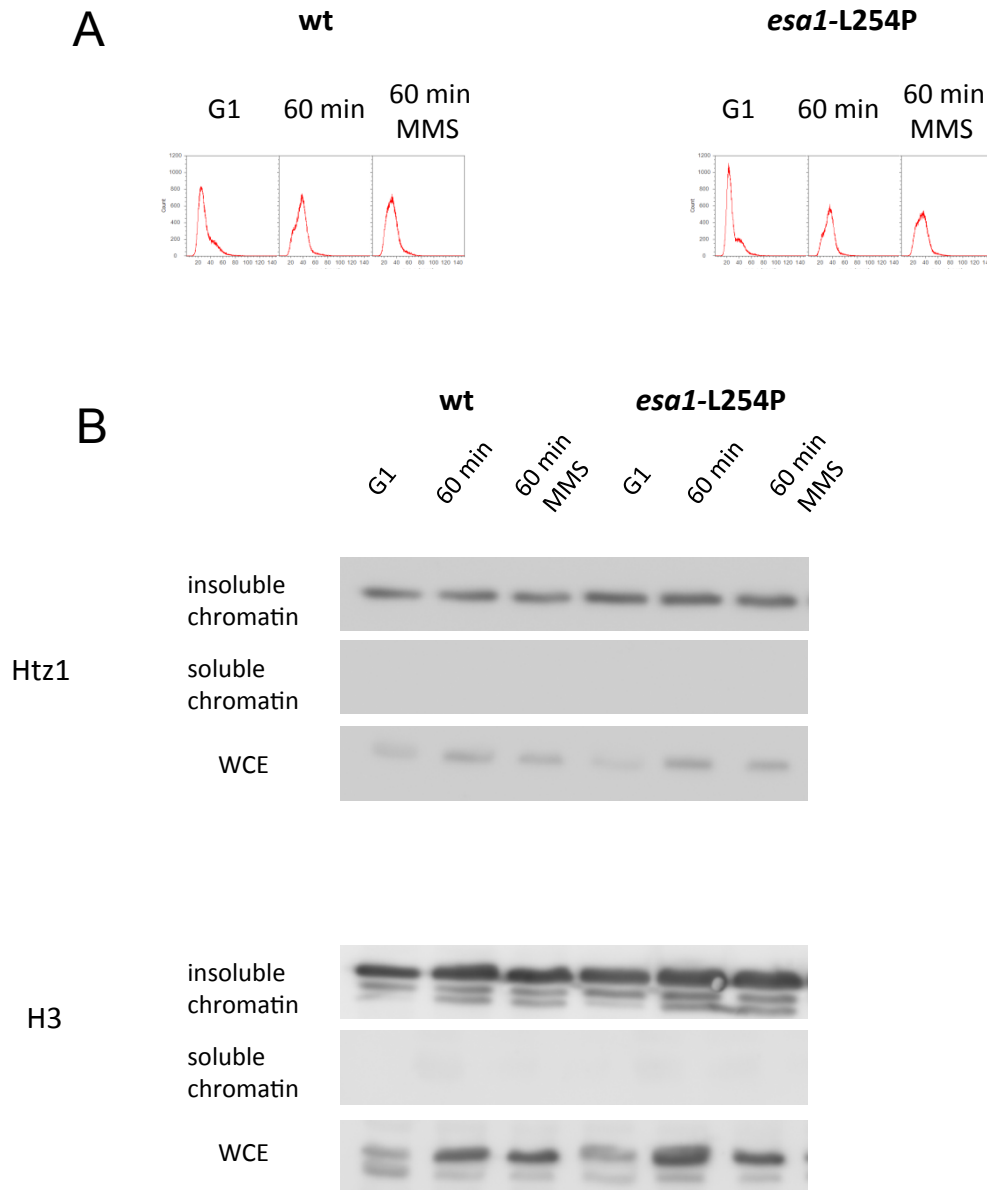

**Figure S8 Chromatin association of H2A.Z.** H2A.Z (Htz1) levels are the same between wild type (JC470) and *esa1-L254P* (JC2767), independent of cell cycle phase and treatment with MMS. Chromatin association experiment where cells arrested in  $\alpha$ -factor are released into normal YPAD or YPAD/0.01% MMS. Cell cycle progression was monitored using flow cytometry (A). Samples were subjected to chromatin association fractionation followed by 18% gel SDS-PAGE and immunoblot with anti-H2A.Z (B). Histone H3 immunoblot was used as both a loading control and control for fractionation.
