# Supplementary material
Source: PubMed Central journal article supplement (PMC4391564)
Supplement: supp_115.174490_FigureS1.pdf [file supp_115.174490_FigureS1.pdf]

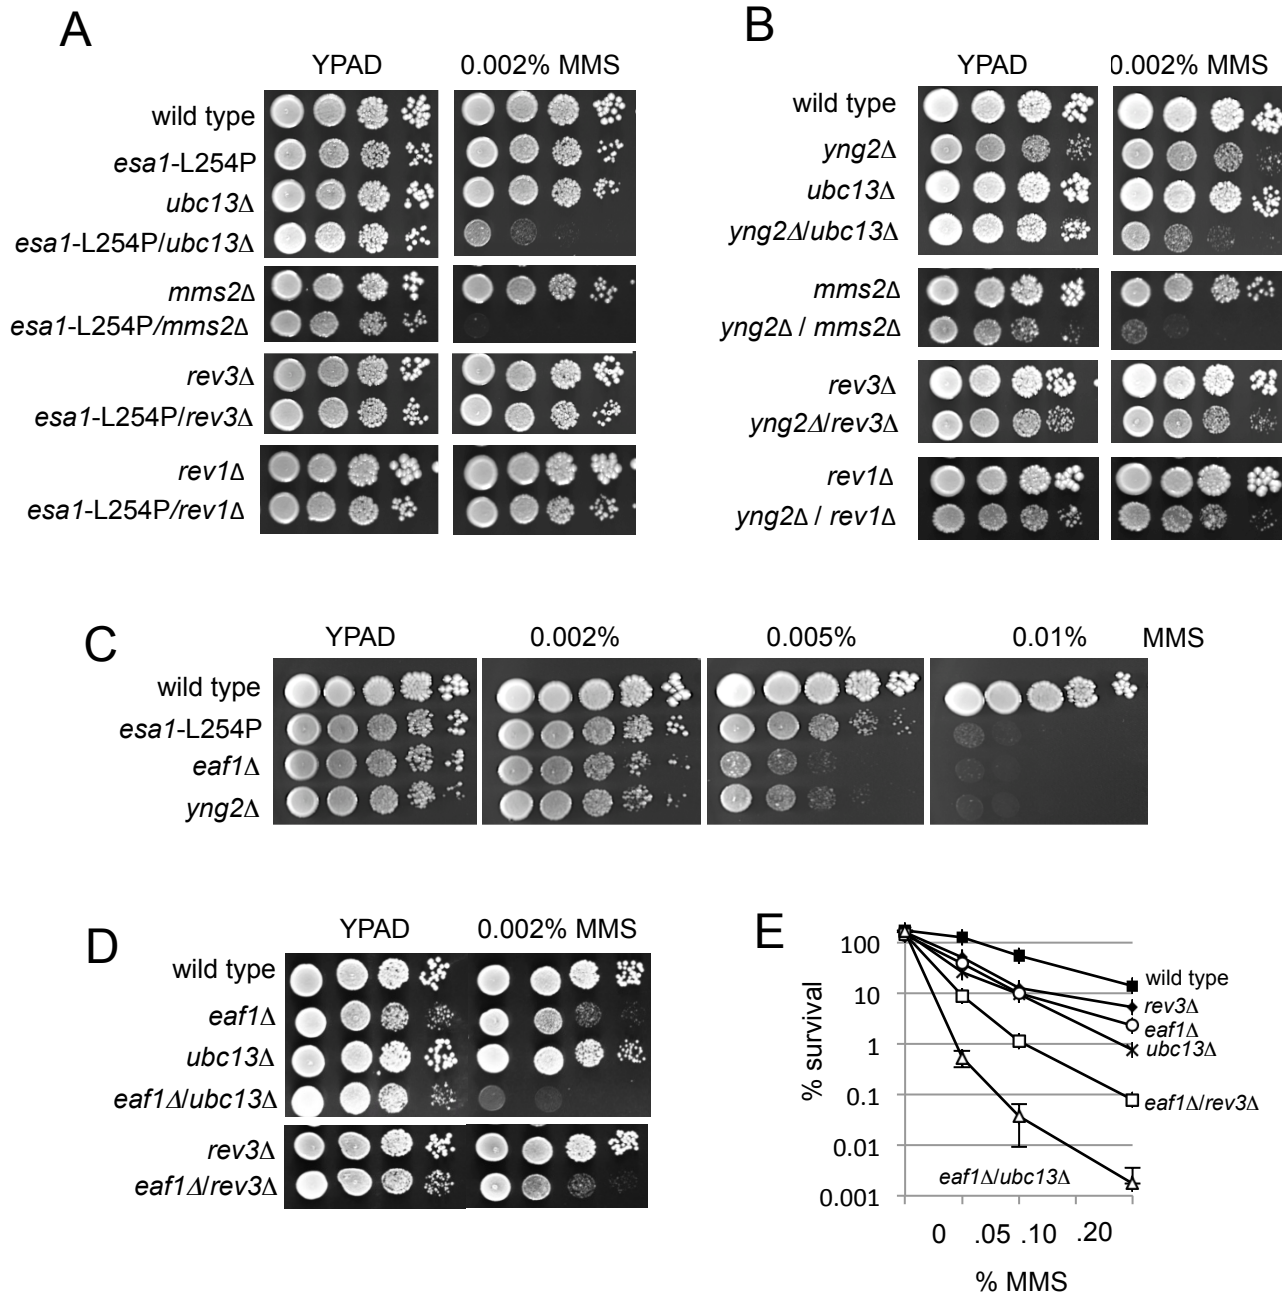

**Figure S1 Similar to other NuA4 components, the loss of EAF1 interacts genetically with the DNA damage tolerance (DDT) pathway.** (A) Drop assays (1:10 serial dilutions) from exponentially growing cultures were performed on YPAD +/- media containing the indicated concentrations of MMS at 30°C for wild type (JC470), *esa1-L254P* (JC2767), *ubc13Δ* (JC2291), *esa1-L254P/ubc13Δ* (JC2775), *mms2Δ* (JC2290), *esa1-L254P/mms2Δ* (JC2773), *rev3Δ* (JC2289), and *esa1-L254P/rev3Δ* (JC2771), *rev1Δ* (JC2257), and *esa1-L254P/rev1Δ* (JC2769). (B) *yng2Δ* (JC2036), *yng2Δ/ubc13Δ* (JC2285), *yng2Δ/mms2Δ* (JC2283), *yng2Δ/rev3Δ* (JC2281) and *yng2Δ/rev1Δ* (JC2619). (C) *eaf1Δ* (JC3430), *yng2Δ* (JC2036), and (D) *ubc13Δ* (JC2291), *eaf1Δ/ubc13Δ* (JC3219), *rev3Δ* (JC2289), and *eaf1Δ/rev3Δ* (JC3220). (E) Cell survival was measured after transient exposure to increasing concentrations of MMS for 1 hr. with the same strains in D.
