# Supplementary material
Source: PubMed Central journal article supplement (PMC4391564)
Supplement: supp_115.174490_FigureS2.pdf [file supp_115.174490_FigureS2.pdf]

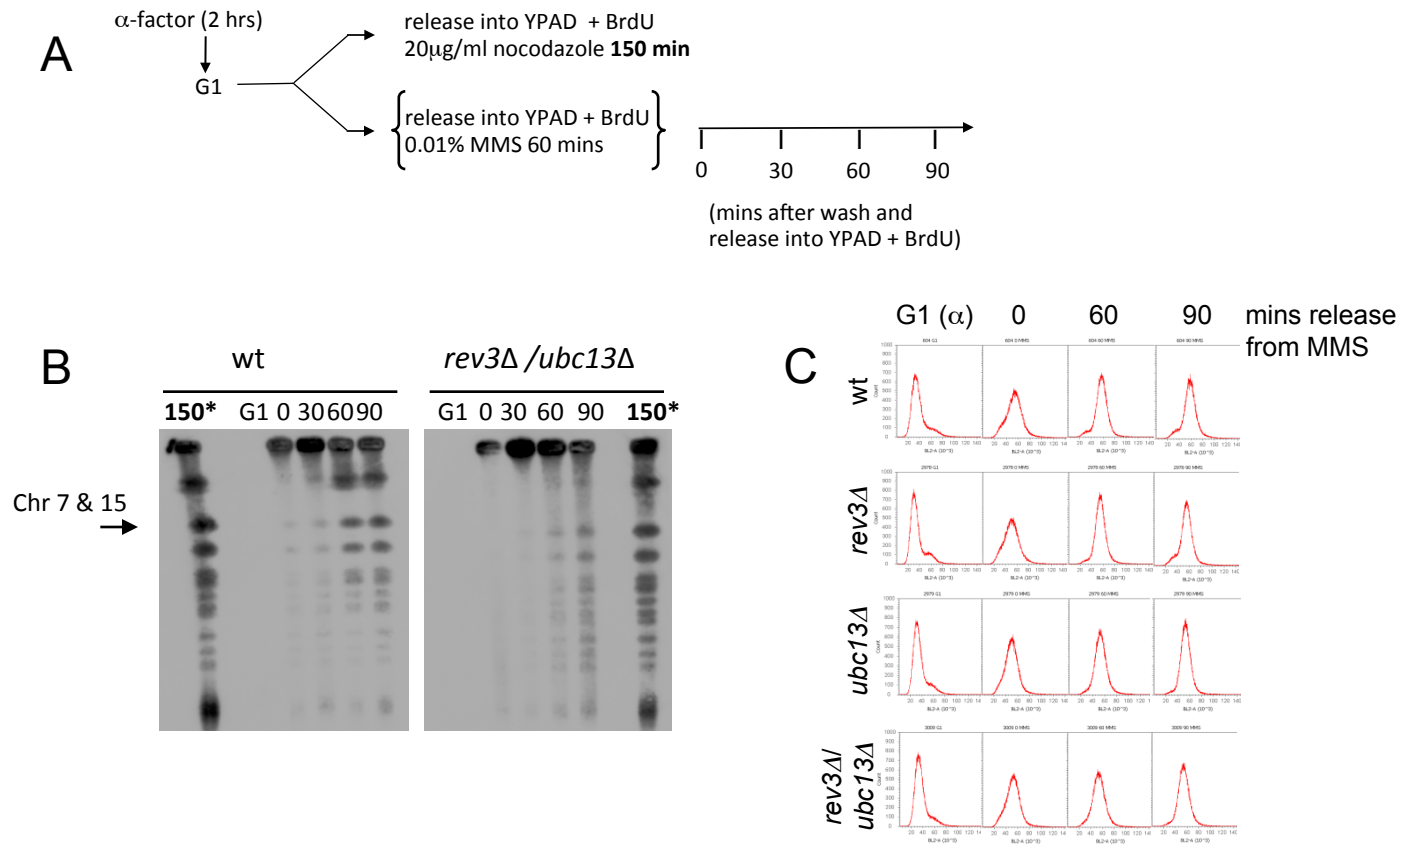

**Figure S2 Pulse Field Gel Electrophoresis (PFGE) was performed on cells disrupted for DDT factors.** (A) Cells were arrested in  $\alpha$ -factor for 2 hours followed by release into YPAD media containing bromodeoxyuridine (BrdU; 400 $\mu$ g/ml) and either nocodazole (7.5 $\mu$ g/ml) for 2.5 hours or 0.01% MMS for 1 hour. Following MMS treatment, cells were released into YPAD and samples were collected at the indicated time points. (B) Pulse Field Gel Electrophoresis (PFGE) was performed, followed by a Southern transfer to nitrocellulose, and blotted with  $\alpha$ -BrdU antibodies in wild type (JC604) and *rev3 $\Delta$ /ubc13 $\Delta$*  (JC3009), (C) The cell cycle stage was monitored by flow cytometry. All data shown here follows the same protocols as in Figs. 2 and 3.
