# Supplementary material
Source: PubMed Central journal article supplement (PMC4391564)
Supplement: supp_115.174490_FigureS5.pdf [file supp_115.174490_FigureS5.pdf]

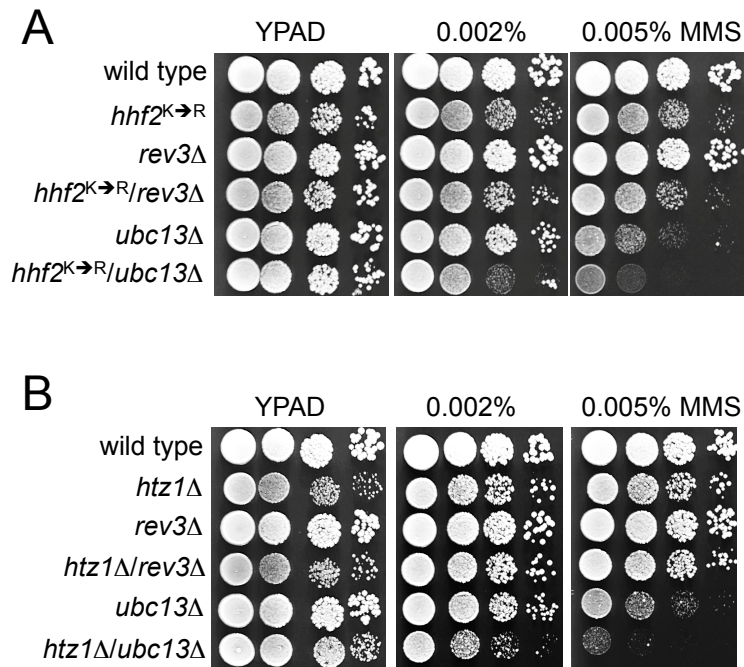

**Figure S5 NuA4 target histone H4 shows genetic interactions with the DDT pathway (A)** Drop assays (1:10 serial dilutions) from exponentially growing cultures were performed on YPAD +/- media containing the indicated concentrations of MMS at 30°C for wild type (JC470), *hhf2<sup>K→R</sup>* (JC3178), *rev3Δ* (JC2289), *hhf2<sup>K→R</sup>/rev3Δ* (JC3195) *ubc13Δ* (JC2291), *hhf2<sup>K→R</sup>/ubc13Δ* (JC3179), and (B) *htz1Δ* (JC2090), *htz1Δ/rev3Δ* (JC2762) and *htz1Δ/ubc13Δ* (JC2764)
