# Supplementary material
Source: PubMed Central journal article supplement (PMC4391564)
Supplement: supp_115.174490_FigureS7.pdf [file supp_115.174490_FigureS7.pdf]

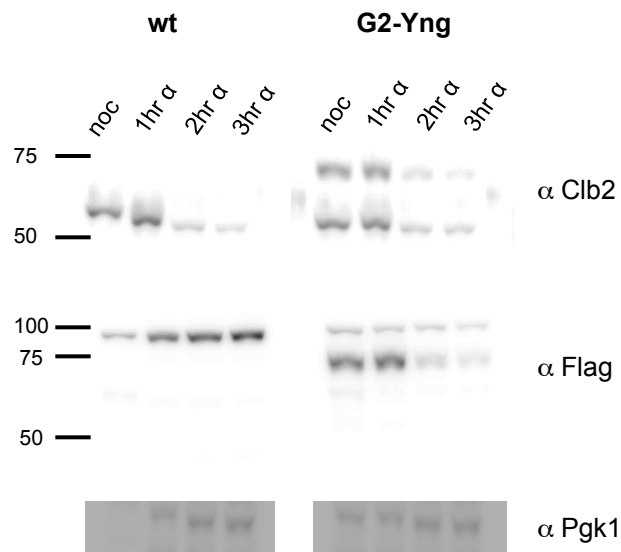

**Figure S7 G2-Yng2 expression after Nocodazole release.** Degradation of G2-Yng2 after S-phase follows the same pattern as Clb2. During a normal cell cycle Clb2 is rapidly degraded at mitosis. Wild type (JC470) and G2-Yng2 (JC3387) were arrested in nocodazole for 3 hours following release into YPAD media with  $\alpha$ -factor with samples taken at indicated times. Immunoblots were performed with antibodies  $\alpha$ -Clb2 and  $\alpha$ -Flag (to visualize G2-Yng2-Flag, and  $\alpha$ -Pgk1 used as a loading control. Degradation of G2-Yng2 follows the same kinetics as degradation of Clb2 in both G2-Yng2 and wild type cells.
