# Supplementary material
Source: PubMed Central journal article supplement (PMC4391564)
Supplement: supp_115.174490_FigureS8.pdf [file supp_115.174490_FigureS8.pdf]

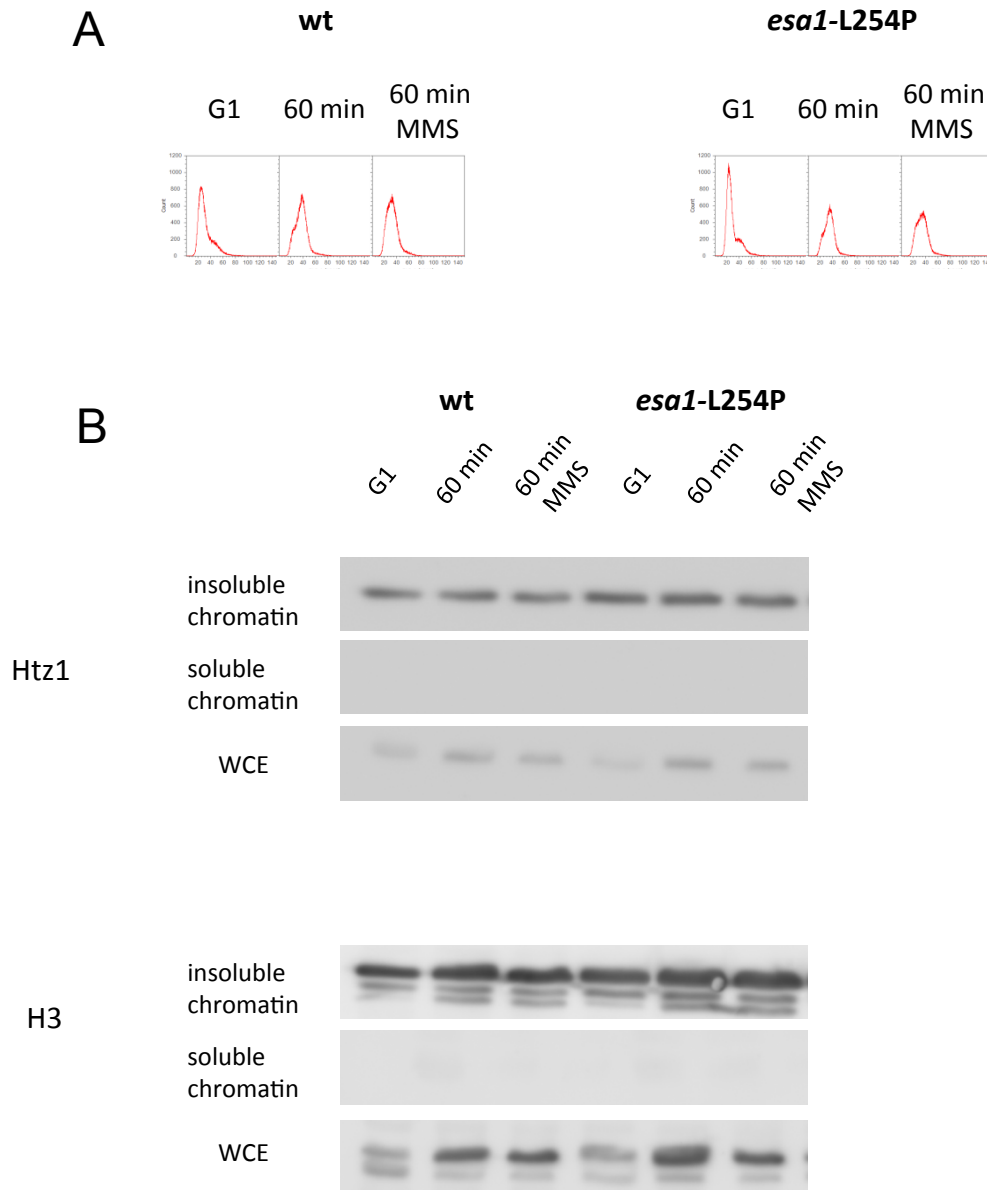

**Figure S8 Chromatin association of H2A.Z.** H2A.Z (Htz1) levels are the same between wild type (JC470) and *esa1-L254P* (JC2767), independent of cell cycle phase and treatment with MMS. Chromatin association experiment where cells arrested in  $\alpha$ -factor are released into normal YPAD or YPAD/0.01% MMS. Cell cycle progression was monitored using flow cytometry (A). Samples were subjected to chromatin association fractionation followed by 18% gel SDS-PAGE and immunoblot with anti-H2A.Z (B). Histone H3 immunoblot was used as both a loading control and control for fractionation.
