# Supplementary material
Source: PubMed Central journal article supplement (PMC4391564)
Supplement: supp_115.174490_TableS1.pdf [file supp_115.174490_TableS1.pdf]

Table S1: qPCR primers used in this study

| <i>Gene</i>  | primer name | sequence                  |
|--------------|-------------|---------------------------|
| <i>RAD6</i>  | C1205       | TGCCCCACCGGGTGTA          |
|              | C1166       | GCGTTCCATACCATGACGTTATC   |
| <i>RAD18</i> | C1167       | G TTCAGG TTCAGTGGGACATTCT |
|              | C1168       | GGTTCCCTGGTCACTTTGAACT    |
| <i>UBC13</i> | C1171       | TGACGTCGCTGAAGATTGGA      |
|              | C1172       | CATTCGCGAGCCTTAGCTTT      |
| <i>REV3</i>  | C1177       | CCATCGCACGGTGAAAGC        |
|              | C1178       | AAGCACCAAACACCCTGATGT     |
| <i>RNR2</i>  | C1197       | CCATTCACACCATCCCAGAAA     |
|              | C1198       | CTTGAATCCATCTTAAAGCCCATT  |
| <i>ALG9</i>  | C1215       | CTGTGGAATTATTGCCTTC       |
|              | C1216       | GCCTAGTATACTAGCCAGG       |
