# Supplementary material
Source: PubMed Central journal article supplement (PMC4391564)
Supplement: supp_115.174490_TableS2.pdf [file supp_115.174490_TableS2.pdf]

Table S2: Strains used in supplemental material

| <i>Strain</i> | <i>Genotype</i>                                   | <i>Source</i>       |
|---------------|---------------------------------------------------|---------------------|
| JC2257        | W303 <i>MATa rev1Δ::HIS3</i>                      | Xiao lab (WXY29-36) |
| JC2283        | W303 <i>MATa yng2Δ::URA3, mms2Δ::HIS3</i>         | this study          |
| JC2290        | W303 <i>MATa mms2Δ::HIS3</i>                      | this study          |
| JC2619        | W303 <i>MATa yng2Δ::URA3, rev1Δ::HIS3</i>         | this study          |
| JC2769        | W303 <i>MATa esa1-L254P::NatRMX4, rev1Δ::HIS3</i> | this study          |
| JC2773        | W303 <i>MATa esa1-L254P::NatRMX4, mms2Δ::HIS3</i> | this study          |
| JC3119        | W303 <i>MATa eaf1Δ::URA3, ubc13Δ::HIS3</i>        | this study          |
| JC3220        | W303 <i>MATa eaf1Δ::URA3, rev3Δ::LEU2</i>         | this study          |
| JC3430        | W303 <i>MATa eaf1Δ::URA3</i>                      | this study          |
